# Supplementary material
Source: Springer Nature journal article supplement (https://www.springermedizin.de/resource/supplementary/13023_2013_628_MOESM3_ESM.pdf/9642548)
Supplement: MOESM3 [file 9642548]

# Advisory Board

Expert in Technical Aspects

Patients' Association Representative

Expert in Legal/Ethic Aspects

# Approval/Appeal Panel

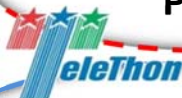

Scientific Committee - Reviewers  
Chief Scientific Officer - L. Monaco  
Research Program Manager - M. Crimi

Coordinator Emeritus  
F. Dagna Bricarelli

# Network Board

Coordination Office  
Coordinator – M. Filocamo  
Secretary - L. Casareto

P1 - C. Baldo

P2 - S. Goldwurm

P3 - A. Renieri

P7 - G. Merla

P9 - B. Garavaglia

P5 - M. Moggio

P4 - C. Angelini

P6 - M. Mora

P8 - L. Politano

JNB
